# Supplementary material
Source: Springer Nature journal article supplement (https://www.springermedizin.de/resource/supplementary/13601_2013_646_MOESM9_ESM.pdf/9677908)
Supplement: MOESM9 [file 9677908]

**Table 3.** Median ICS dose increase following initial FeNO reading, split by FeNO category. Patients with a high FeNO had a significantly larger ICS dose increase than those with normal or intermediate levels at first assessment.

|                                           | Initial FeNO Reading |              |               | Total       | p-value<br>(Kruskal<br>Wallis) |
|-------------------------------------------|----------------------|--------------|---------------|-------------|--------------------------------|
|                                           | Low                  | Intermediate | High          |             |                                |
| n(%)                                      | 276 (55.5)           | 135 (27.2)   | 86 (17.3)     | 497 (100.0) | <0.001                         |
| Median (IQR)<br>ICS dose<br>increase (µg) | 0 (0–261)            | 152 (0–382)  | 219 (109–429) | –           |                                |
